# Supplementary material for: Coeval primary and diagenetic carbonates in lacustrine sediments challenge palaeoclimate interpretations
Source: Springer Nature journal article supplement (doi:10.1038/s41598-021-86872-1), 2021-04-12
Supplement: MOESM1 [file 41598_2021_86872_MOESM1_ESM.pdf]

Supplementary Information for:

**Coeval primary and diagenetic carbonates in lacustrine sediments challenge palaeoclimate interpretations**

**Authors: Jeremy McCormack & Ola Kwiecien**

**This PDF file includes:**

Legend for Supplementary Table 1

**Supplementary Table 1:** Oxygen and carbon isotope composition of aragonite encrustations. Additional information includes depth in the Ahlat Ridge core, core section, depth in core section, age after Stockhecke et al.<sup>49</sup> and whether encrusted ostracod valves or encrusted hollow casts were measured (sheet 1 in the accompanying .xlsx file).
